# Supplementary material for: Telehealth Use among Community Health Centers and Cardio-Metabolic Health Outcomes
Source: PubMed Central journal article supplement (PMC7348805; doi:10.3390/healthcare8020165), 2020-06-10
Supplement: healthcare-08-00165-s001.pdf [file healthcare-08-00165-s001.pdf]

**Table S1.** Raw and multivariable adjusted p-values for table 4 and 5

|                                                                         | Table 4                                                                                                          |                     |          |                      |                                                                                                                  |                     |          |                      | Table 5                                                                                                          |                     |          |                      |                                                                                                                  |                     |          |                      |
|-------------------------------------------------------------------------|------------------------------------------------------------------------------------------------------------------|---------------------|----------|----------------------|------------------------------------------------------------------------------------------------------------------|---------------------|----------|----------------------|------------------------------------------------------------------------------------------------------------------|---------------------|----------|----------------------|------------------------------------------------------------------------------------------------------------------|---------------------|----------|----------------------|
|                                                                         | Zip code: Urban                                                                                                  |                     |          |                      | Zip code: Rural                                                                                                  |                     |          |                      | Zip code: Urban                                                                                                  |                     |          |                      | Zip code: Rural                                                                                                  |                     |          |                      |
|                                                                         | [(Telehealth use in 2017 – No telehealth use in 2016) – (No telehealth use in 2017 – No telehealth use in 2016)] |                     |          |                      | [(Telehealth use in 2017 – No telehealth use in 2016) – (No telehealth use in 2017 – No telehealth use in 2016)] |                     |          |                      | [(Telehealth use in 2017 – No telehealth use in 2016) – (No telehealth use in 2017 – No telehealth use in 2016)] |                     |          |                      | [(Telehealth use in 2017 – No telehealth use in 2016) – (No telehealth use in 2017 – No telehealth use in 2016)] |                     |          |                      |
|                                                                         | Raw                                                                                                              | Stepdown Bonferroni | Hochberg | False Discovery Rate | Raw                                                                                                              | Stepdown Bonferroni | Hochberg | False Discovery Rate | Raw                                                                                                              | Stepdown Bonferroni | Hochberg | False Discovery Rate | Raw                                                                                                              | Stepdown Bonferroni | Hochberg | False Discovery Rate |
| Number with managed hypertension / total                                | 0.533                                                                                                            | 1.000               | 0.969    | 0.800                | 0.013                                                                                                            | 0.143               | 0.143    | 0.078                | 0.481                                                                                                            | 1.000               | 0.992    | 0.883                | 0.618                                                                                                            | 1.000               | 0.992    | 0.883                |
| Number with managed diabetes / total                                    | 0.969                                                                                                            | 1.000               | 0.969    | 0.969                | 0.246                                                                                                            | 1.000               | 0.969    | 0.562                | 0.247                                                                                                            | 1.000               | 0.992    | 0.883                | 0.943                                                                                                            | 1.000               | 0.992    | 0.992                |
| Number with preventive care and screening of body mass index / total    | 0.370                                                                                                            | 1.000               | 0.969    | 0.635                | 0.003                                                                                                            | 0.041               | 0.041    | 0.041                | 0.226                                                                                                            | 1.000               | 0.992    | 0.883                | 0.992                                                                                                            | 1.000               | 0.992    | 0.992                |
| Number with weight assessment and counseling for nutrition and physical | 0.281                                                                                                            | 1.000               | 0.969    | 0.562                | 0.219                                                                                                            | 1.000               | 0.969    | 0.562                | 0.663                                                                                                            | 1.000               | 0.992    | 0.883                | 0.032                                                                                                            | 0.385               | 0.385    | 0.385                |

|                                                                   |           |       |       |       |           |       |       |       |           |       |       |       |           |       |       |       |  |
|-------------------------------------------------------------------|-----------|-------|-------|-------|-----------|-------|-------|-------|-----------|-------|-------|-------|-----------|-------|-------|-------|--|
| activity /<br>total                                               |           |       |       |       |           |       |       |       |           |       |       |       |           |       |       |       |  |
| Number<br>taking<br>lipid<br>therapy<br>for CAD /<br>total        | 0.95<br>6 | 1.000 | 0.969 | 0.969 | 0.75<br>7 | 1.000 | 0.969 | 0.909 | 0.53<br>4 | 1.000 | 0.992 | 0.883 | 0.29<br>6 | 1.000 | 0.992 | 0.883 |  |
| Number<br>taking<br>antiplatele<br>t therapy<br>for IVD<br>/total | 0.73<br>1 | 1.000 | 0.969 | 0.909 | 0.08<br>2 | 0.816 | 0.816 | 0.326 | 0.90<br>5 | 1.000 | 0.992 | 0.992 | 0.38<br>7 | 1.000 | 0.992 | 0.883 |  |
